# Supplementary material
Source: Research Square preprint supplement (doi:10.21203/rs.3.rs-9496905/v1)
Supplement: Supplementary file 1 [file 0a686ec707a6423b0b05af15.docx]

**Appendix - Table S1. Country-specific macro-level indicators**

|  | Economic indicators | | Socioeconomic indicators | | Health system indicators | | | |
| --- | --- | --- | --- | --- | --- | --- | --- | --- |
| Country | GDP per capita | Median income | Unemployment rate | Gini index | Health expenditure  (% of GDP) | Health expenditure per capita | Hospital beds per 1000 people | Physicians per 1000 people |
| Argentina | $13,970 | $6,895 | 7.2 | 0.42 | 10.4 | $2,850 | 3.4 | 5.1 |
| Australia | $64,604 | $39,072 | 3.9 | 0.32 | 10.3 | $5,991 | 3.8 | 4.1 |
| Brazil | $10,311 | $9,241 | 6.8 | 0.45 | 9.4 | $1,661 | 2.5 | 2.4 |
| Canada | $54,340 | $49,661 | 6.4 | 0.31 | 11.3 | $5,946 | 2.5 | 2.8 |
| Chile | $16,710 | $15,566 | 8.7 | 0.45 | 10.5 | $3,199 | 1.9 | 3.3 |
| China | $13,303 | $3,935 | 4.6 | 0.51 | 5.2 | $1,086 | 5.6 | 3.1 |
| France | $46,103 | $41,089 | 7.4 | 0.30 | 11.5 | $6,113 | 5.7 | 3.3 |
| Germany | $56,104 | $41,902 | 3.4 | 0.31 | 12.3 | $7,553 | 7.6 | 4.5 |
| Japan | $32,487 | $25,602 | 2.5 | 0.34 | 10.6 | $4,780 | 12.6 | 2.6 |
| Mexico | $14,186 | $9,299 | 2.7 | 0.40 | 5.9 | $1,289 | 1.0 | 2.6 |
| Netherlands | $67,520 | $47,763 | 3.7 | 0.29 | 10.0 | $6,535 | 2.4 | 3.9 |
| New Zealand | $49,205 | $39,408 | 4.7 | 0.33 | 10.1 | $4,815 | 2.5 | 3.6 |
| Spain | $35,327 | $39,676 | 11.4 | 0.31 | 9.2 | $3,963 | 2.9 | 4.3 |
| United Kingdom | $53,246 | $35,824 | 4.4 | 0.37 | 11.1 | $5,493 | 2.4 | 3.3 |
| United States | $84,534 | $49,885 | 4.0 | 0.39 | 17.2 | $12,649 | 2.7 | 3.7 |

GDP gross domestic product

GDP per capita, unemployment rate, hospital beds per 1000 people and physicians per 1000 people were derived from the World Bank (<https://databank.worldbank.org/source/world-development-indicators>). Median income, Gini index, health expenditure (% of GDP) and health expenditure per capita were derived from the OECD (<https://stats.oecd.org>), except for the Gini index for Argentina which was derived from the World Bank. Median income was downloaded in local currency and converted to USD based on exchange rates for the corresponding year.

**Appendix - Table S2. Mean EQ VAS by country, age and sex (sampling weights applied)**

|  |  | Age group | |  |  |  |  |  |  |
| --- | --- | --- | --- | --- | --- | --- | --- | --- | --- |
| Country |  | 18-24 | 25-34 | 35-44 | 45-54 | 55-64 | 65-74 | 75+ | Total |
| Argentina | Male | 80.6 | 78.6 | 79.4 | 77.2 | 79.0 | 74.5 | 77.6 | 78.7 |
|  | Female | 73.4 | 74.2 | 76.2 | 74.8 | 77.3 | 75.3 | 77.8 | 75.4 |
|  | Total | 76.9 | 76.5 | 77.9 | 75.9 | 78.1 | 74.8 | 77.7 | 77.0 |
| Australia | Male | 75.7 | 78.6 | 76.5 | 70.3 | 69.3 | 72.9 | 74.5 | 74.2 |
|  | Female | 69.6 | 71.7 | 70.6 | 67.9 | 69.9 | 73.3 | 73.6 | 70.8 |
|  | Total | 72.1 | 75.2 | 73.6 | 69.0 | 69.6 | 73.1 | 74.1 | 72.5 |
| Brazil | Male | 77.3 | 78.1 | 78.2 | 75.6 | 76.7 | 82.0 | 83.5 | 77.7 |
|  | Female | 69.0 | 72.8 | 72.9 | 74.3 | 75.8 | 68.9 | 73.3 | 72.8 |
|  | Total | 73.1 | 75.2 | 75.6 | 75.0 | 76.2 | 76.1 | 81.3 | 75.2 |
| Canada | Male | 78.1 | 72.5 | 73.4 | 69.9 | 71.1 | 72.8 | 73.3 | 72.6 |
|  | Female | 72.8 | 72.2 | 67.2 | 66.8 | 68.9 | 75.0 | 74.0 | 70.6 |
|  | Total | 75.4 | 72.3 | 70.3 | 68.3 | 70.0 | 73.9 | 73.6 | 71.6 |
| Chile | Male | 76.6 | 78.5 | 79.2 | 79.4 | 78.3 | 72.6 | 72.8 | 78.0 |
|  | Female | 71.0 | 72.1 | 71.2 | 72.7 | 74.4 | 78.7 | 78.0 | 72.8 |
|  | Total | 73.8 | 75.1 | 75.4 | 75.8 | 76.3 | 75.5 | 73.8 | 75.4 |
| China | Male | 83.9 | 82.8 | 82.1 | 83.3 | 79.0 | 75.3 | . | 80.7 |
|  | Female | 74.9 | 83.5 | 84.0 | 81.8 | 77.9 | 72.5 | 60.5 | 79.5 |
|  | Total | 79.6 | 83.1 | 83.1 | 82.5 | 78.5 | 73.9 | 60.5 | 80.1 |
| France | Male | 74.2 | 75.0 | 71.4 | 71.4 | 72.0 | 73.1 | 73.1 | 72.8 |
|  | Female | 70.9 | 69.4 | 69.3 | 67.2 | 70.4 | 73.5 | 72.9 | 70.4 |
|  | Total | 72.5 | 72.1 | 70.4 | 69.2 | 71.2 | 73.3 | 73.0 | 71.6 |
| Germany | Male | 72.3 | 74.0 | 76.0 | 74.5 | 72.0 | 72.5 | 70.2 | 73.3 |
|  | Female | 67.9 | 74.3 | 71.1 | 75.2 | 69.6 | 70.9 | 70.2 | 71.3 |
|  | Total | 70.0 | 74.2 | 73.8 | 74.9 | 70.7 | 71.7 | 70.2 | 72.3 |
| Japan | Male | 73.9 | 73.3 | 73.1 | 73.6 | 73.9 | 75.0 | 76.4 | 74.2 |
|  | Female | 73.9 | 70.9 | 69.3 | 70.5 | 74.5 | 77.7 | 75.1 | 73.5 |
|  | Total | 73.9 | 71.7 | 70.9 | 72.1 | 74.1 | 76.4 | 75.8 | 73.8 |
| Mexico | Male | 80.6 | 81.7 | 79.7 | 81.7 | 82.4 | 79.9 | 89.9 | 81.2 |
|  | Female | 75.9 | 77.5 | 78.0 | 78.9 | 77.6 | 76.9 | 68.0 | 77.3 |
|  | Total | 78.2 | 79.4 | 78.9 | 80.5 | 79.8 | 78.7 | 82.1 | 79.2 |
| Netherlands | Male | 75.5 | 73.4 | 75.1 | 74.4 | 73.8 | 79.4 | 76.0 | 75.5 |
|  | Female | 72.8 | 70.7 | 71.1 | 71.5 | 71.0 | 75.4 | 76.1 | 72.5 |
|  | Total | 74.0 | 72.0 | 73.2 | 72.9 | 72.4 | 77.3 | 76.0 | 74.0 |
| New Zealand | Male | 76.0 | 80.0 | 80.2 | 76.6 | 72.1 | 76.1 | 79.7 | 77.5 |
|  | Female | 72.7 | 73.3 | 73.8 | 72.1 | 71.6 | 75.6 | 78.0 | 73.5 |
|  | Total | 74.4 | 76.6 | 76.7 | 74.4 | 71.8 | 75.8 | 78.9 | 75.4 |
| Spain | Male | 75.5 | 74.9 | 74.7 | 74.2 | 73.1 | 75.2 | 74.2 | 74.5 |
|  | Female | 72.0 | 70.8 | 71.9 | 72.6 | 73.2 | 74.1 | 65.4 | 72.4 |
|  | Total | 73.9 | 72.7 | 73.4 | 73.4 | 73.1 | 74.7 | 70.3 | 73.5 |
| United Kingdom | Male | 70.6 | 74.0 | 71.2 | 65.9 | 68.9 | 73.4 | 73.3 | 70.7 |
|  | Female | 69.8 | 69.8 | 66.0 | 65.6 | 70.0 | 75.0 | 73.6 | 69.4 |
|  | Total | 70.2 | 71.8 | 68.5 | 65.7 | 69.5 | 74.2 | 73.5 | 70.0 |
| United States | Male | 77.8 | 76.9 | 75.4 | 71.8 | 71.4 | 74.6 | 77.9 | 74.7 |
|  | Female | 76.3 | 75.0 | 70.1 | 66.3 | 69.7 | 73.6 | 76.2 | 72.0 |
|  | Total | 77.0 | 75.9 | 72.8 | 69.2 | 70.5 | 74.1 | 77.1 | 73.3 |

**Appendix - Table S3. Mean EQ-5D-5L values by country, age and sex (sampling weights applied)**

|  |  | Age group | |  |  |  |  |  |  |
| --- | --- | --- | --- | --- | --- | --- | --- | --- | --- |
| Country |  | 18-24 | 25-34 | 35-44 | 45-54 | 55-64 | 65-74 | 75+ | Total |
| Argentina | Male | 0.90 | 0.89 | 0.90 | 0.89 | 0.90 | 0.87 | 0.86 | 0.90 |
|  | Female | 0.88 | 0.87 | 0.87 | 0.86 | 0.86 | 0.84 | 0.85 | 0.86 |
|  | Total | 0.89 | 0.88 | 0.88 | 0.88 | 0.88 | 0.86 | 0.85 | 0.88 |
| Australia | Male | 0.91 | 0.92 | 0.92 | 0.88 | 0.87 | 0.89 | 0.88 | 0.90 |
|  | Female | 0.84 | 0.87 | 0.88 | 0.86 | 0.86 | 0.88 | 0.86 | 0.87 |
|  | Total | 0.87 | 0.90 | 0.90 | 0.87 | 0.86 | 0.89 | 0.87 | 0.88 |
| Brazil | Male | 0.82 | 0.83 | 0.84 | 0.81 | 0.82 | 0.85 | 0.79 | 0.83 |
|  | Female | 0.77 | 0.80 | 0.80 | 0.81 | 0.79 | 0.76 | 0.75 | 0.79 |
|  | Total | 0.80 | 0.81 | 0.82 | 0.81 | 0.80 | 0.81 | 0.78 | 0.81 |
| Canada | Male | 0.83 | 0.82 | 0.83 | 0.81 | 0.81 | 0.82 | 0.84 | 0.82 |
|  | Female | 0.81 | 0.82 | 0.79 | 0.76 | 0.78 | 0.81 | 0.80 | 0.80 |
|  | Total | 0.82 | 0.82 | 0.81 | 0.79 | 0.80 | 0.82 | 0.82 | 0.81 |
| Chile | Male | 0.83 | 0.82 | 0.84 | 0.84 | 0.83 | 0.85 | 0.84 | 0.83 |
|  | Female | 0.78 | 0.79 | 0.77 | 0.78 | 0.76 | 0.83 | 0.80 | 0.78 |
|  | Total | 0.81 | 0.80 | 0.81 | 0.80 | 0.80 | 0.84 | 0.84 | 0.81 |
| China | Male | 0.96 | 0.94 | 0.93 | 0.94 | 0.91 | 0.86 | 0.73 | 0.92 |
|  | Female | 0.95 | 0.95 | 0.95 | 0.94 | 0.90 | 0.83 | 0.72 | 0.92 |
|  | Total | 0.95 | 0.94 | 0.94 | 0.94 | 0.91 | 0.84 | 0.72 | 0.92 |
| France | Male | 0.92 | 0.93 | 0.92 | 0.92 | 0.93 | 0.93 | 0.93 | 0.92 |
|  | Female | 0.90 | 0.90 | 0.91 | 0.88 | 0.89 | 0.92 | 0.91 | 0.90 |
|  | Total | 0.91 | 0.92 | 0.91 | 0.90 | 0.91 | 0.92 | 0.92 | 0.91 |
| Germany | Male | 0.83 | 0.83 | 0.87 | 0.89 | 0.87 | 0.88 | 0.85 | 0.86 |
|  | Female | 0.81 | 0.86 | 0.86 | 0.87 | 0.84 | 0.84 | 0.83 | 0.85 |
|  | Total | 0.82 | 0.85 | 0.87 | 0.88 | 0.85 | 0.86 | 0.84 | 0.85 |
| Japan | Male | 0.88 | 0.91 | 0.88 | 0.90 | 0.90 | 0.91 | 0.91 | 0.90 |
|  | Female | 0.85 | 0.87 | 0.87 | 0.88 | 0.90 | 0.92 | 0.87 | 0.89 |
|  | Total | 0.86 | 0.88 | 0.87 | 0.89 | 0.90 | 0.91 | 0.89 | 0.90 |
| Mexico | Male | 0.92 | 0.92 | 0.90 | 0.92 | 0.89 | 0.91 | 0.94 | 0.91 |
|  | Female | 0.90 | 0.91 | 0.91 | 0.90 | 0.88 | 0.90 | 0.65 | 0.90 |
|  | Total | 0.91 | 0.91 | 0.90 | 0.91 | 0.89 | 0.91 | 0.83 | 0.90 |
| Netherlands | Male | 0.82 | 0.83 | 0.81 | 0.85 | 0.82 | 0.86 | 0.85 | 0.83 |
|  | Female | 0.81 | 0.78 | 0.79 | 0.81 | 0.79 | 0.81 | 0.79 | 0.80 |
|  | Total | 0.81 | 0.81 | 0.80 | 0.83 | 0.81 | 0.83 | 0.82 | 0.82 |
| New Zealand | Male | 0.82 | 0.85 | 0.86 | 0.87 | 0.78 | 0.84 | 0.85 | 0.84 |
|  | Female | 0.83 | 0.85 | 0.86 | 0.82 | 0.81 | 0.81 | 0.80 | 0.83 |
|  | Total | 0.82 | 0.85 | 0.86 | 0.85 | 0.80 | 0.83 | 0.82 | 0.84 |
| Spain | Male | 0.90 | 0.87 | 0.88 | 0.89 | 0.88 | 0.88 | 0.87 | 0.88 |
|  | Female | 0.86 | 0.86 | 0.86 | 0.86 | 0.85 | 0.87 | 0.78 | 0.86 |
|  | Total | 0.88 | 0.86 | 0.87 | 0.88 | 0.87 | 0.88 | 0.83 | 0.87 |
| United Kingdom | Male | 0.78 | 0.81 | 0.79 | 0.73 | 0.78 | 0.81 | 0.79 | 0.78 |
|  | Female | 0.77 | 0.76 | 0.74 | 0.70 | 0.74 | 0.78 | 0.77 | 0.75 |
|  | Total | 0.77 | 0.79 | 0.76 | 0.72 | 0.76 | 0.79 | 0.78 | 0.76 |
| United States | Male | 0.85 | 0.78 | 0.82 | 0.83 | 0.80 | 0.84 | 0.87 | 0.82 |
|  | Female | 0.80 | 0.82 | 0.76 | 0.71 | 0.77 | 0.79 | 0.79 | 0.78 |
|  | Total | 0.82 | 0.80 | 0.79 | 0.77 | 0.78 | 0.82 | 0.83 | 0.80 |
