# Supplementary material
Source: Research Square preprint supplement (doi:10.21203/rs.3.rs-9496905/v1)
Supplement: Supplementary file 2 [file d7870fc6a10decb96000c5f7.docx]

**Table 1. Sample characteristics of EQ-DAPHNIE respondents across 15 selected countries**


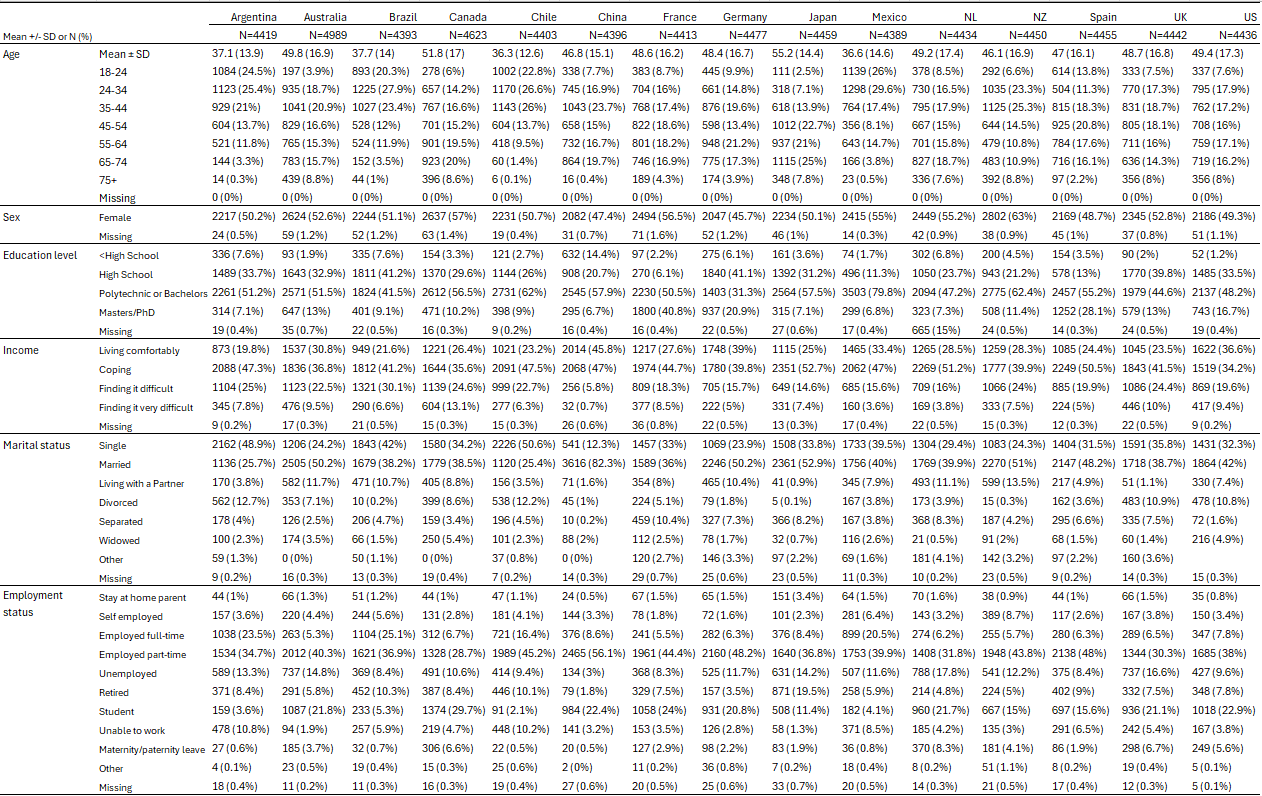


NL Netherlands, NZ New Zealand, UK United Kingdom, US United States, SD standard deviation

**Table 2. Spearman rank correlations between macro-level indicators and EQ-5D-5L outcomes**

|  | Economic indicators | | Socioeconomic indicators | | Health system indicators | | | |
| --- | --- | --- | --- | --- | --- | --- | --- | --- |
|  | GDP per capita | Median income | Unemployment rate | Gini index | Health expenditure  (% of GDP) | Health expenditure per capita | Hospital beds per 1000 people | Physicians per 1000 people |
| Mobility | **0.81** | **0.79** | -0.24 | **-0.66** | 0.47 | **0.76** | -0.20 | 0.27 |
| Self-care | **0.75** | **0.66** | -0.30 | -0.48 | 0.46 | **0.68** | -0.03 | 0.17 |
| Usual activities | **0.79** | **0.74** | -0.23 | **-0.63** | 0.42 | **0.72** | -0.26 | 0.19 |
| Pain/discomfort | **0.80** | **0.86** | -0.08 | **-0.66** | **0.64** | **0.84** | 0.01 | 0.19 |
| Anxiety/depression | 0.33 | 0.29 | 0.25 | 0.02 | **0.53** | 0.35 | -0.20 | 0.05 |
| EQ VAS | **-0.63** | **-0.66** | 0.00 | **0.64** | **-0.72** | **-0.73** | -0.25 | -0.13 |
| EQ-5D-5L LSS | **0.80** | **0.78** | -0.16 | **-0.54** | **0.58** | **0.78** | -0.13 | 0.17 |

GDP gross domestic product, LSS level sum score

Bold numbers indicate significant results (p<0.05)
